# Supplementary material
Source: PubMed Central journal article supplement (PMC3894633)
Supplement: NIHMS544902-supplement-1_si_001.pdf [file NIHMS544902-supplement-1_si_001.pdf]

| ID (ChemDiv) | Structure                                                                           | IC <sub>50</sub> (μM) | Inhibition at 100 μM (%) |
|--------------|-------------------------------------------------------------------------------------|-----------------------|--------------------------|
| K906-3584    | 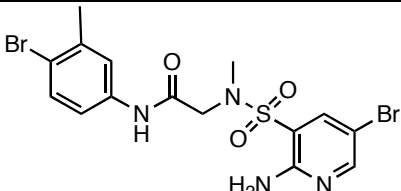   | <0.1                  | 100                      |
| E114-0951    |    | 12.5                  | 100                      |
| E144-0828    |    | 34                    | 70                       |
| C324-0095    |    | >100                  | 24                       |
| E199-0112    |   | >100                  | 18                       |
| K906-3123    |  | >>100                 | 15                       |
| E138-2195    |  | >>100                 | 15                       |
| E138-2099    |  | >>100                 | 10                       |
| C737-3282    |  | >>100                 | 10                       |

|           |                                                                                                                               |     |     |
|-----------|-------------------------------------------------------------------------------------------------------------------------------|-----|-----|
| 4031-0653 | 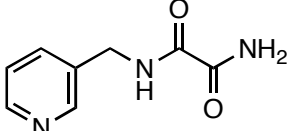 <chem>NC(=O)NCC1=CC=NC=C1</chem>            | 6   | 100 |
| 4031-1995 |  <chem>CC(C)(C)N(C)C(=O)NCC1=CC=NC=C1</chem> | 100 | 60  |
